# Supplementary material for: Impact of the COVID-19 Pandemic on Hepatitis C Treatment Initiation in British Columbia, Canada: An Interrupted Time Series Study
Source: MDPI journal article supplement (doi:10.3390/v16050655), 2024-04-23
Supplement: s1 [file s1]

## Supplementary Materials

### Impact of the COVID-19 pandemic on hepatitis C treatment initiation in British Columbia, Canada: an interrupted time series study

Richard L. Morrow, Mawuena Binka, Julia Li, Mike Irvine, Sofia R. Bartlett, Stanley Wong, Dahn Jeong, Jean Damascene Makuza, Jason Wong, Amanda Yu, Mel Krajden, Naveed Zafar Janjua

#### Table of Contents

|                                                                                                                                                                                       |   |
|---------------------------------------------------------------------------------------------------------------------------------------------------------------------------------------|---|
| Definition of injection drug use .....                                                                                                                                                | 2 |
| Table S1. Data Sources integrated within the BC COVID-19 Cohort (BCC19C) .....                                                                                                        | 3 |
| Table S2. Prescription drugs used to define hepatitis C treatment initiation .....                                                                                                    | 4 |
| Table S3. Median monthly number of individuals initiating hepatitis C treatment during pre-policy period (April 2018 - March 2020) in British Columbia, by population .....           | 5 |
| Table S4. Number of individuals initiating HCV treatment in British Columbia by month and year, 2018 to 2022 .....                                                                    | 6 |
| Figure S1. Monthly number of individuals initiating hepatitis C treatment in British Columbia prior to COVID-19-related policies (April 2017 to March 2020) .....                     | 7 |
| Figure S2. Estimated number of individuals initiating HCV treatment following COVID-19-related policies with 95% confidence band, compared to counterfactual, stratified by sex ..... | 8 |
| Supplementary references .....                                                                                                                                                        | 9 |

### **Definition of injection drug use**

Injection drug use was defined as the occurrence of at least 2 physician visits, 1 hospitalization, or 1 emergency department visit related to major drug-related diagnoses involving addiction, dependence, and drug-induced mental disorders; illicit drug use most likely to be injecting (e.g. excluding cannabis), or illicit use of prescribed drugs including: hallucinogens, barbiturates/tranquillizers, sedatives, hypnotics, anxiolytics, opioids, cocaine, amphetamine.

Diagnosis age was required to be between 11 and 65 years, inclusive.

Any individual who met this definition of injection drug use by the end of the study period (Dec 31, 2022) was classified as a person who injects drugs.

#### *Physician billing data:*

ICD-9 diagnostic codes: starting with 292, 970, 3040-42, 3044-49, 3054-57, 3059, 6483, 7960, 9621, 9650, 9658, 9663-64, 9670, 9684-85, 9694, 9696-99, 9700, 9701, 9708, 9709, E8500 ,or exact codes V6542, 9672, E9397

#### *Hospital data:*

ICD-9-CM (hospitalization data): starting with 292, 970, 3040-42, 3044-49, 3054-7, 3059, 6483, 7960, 9621, 9650, 9658, 9663-64, 9670, 9684-85, 9694, 9696-99, 9700, 9701, 9708, 9709, E8500 , or exact codes V6542, 9672, E9397.

ICD-10-CA (hospitalization or emergency department data): starting with F11, F13-5, F19, Z722 or exact codes R781-82, T387, T400-T406, T408-09, T412, T423-28, T436, T438-39, T507, T4020-23, T4028, T4040-41, T4048.

ICD-10 complaint codes (emergency department data): exact codes 751, 753.

**Table S1. Data Sources integrated within the BC COVID-19 Cohort (BCC19C)**

| <b>British Columbia Centre for Disease Control (BCCDC), Provincial Health Services Authority (PHSA) and Regional Health Authority data sources:</b>                                                                                | <b>Data Date Ranges:</b> |
|------------------------------------------------------------------------------------------------------------------------------------------------------------------------------------------------------------------------------------|--------------------------|
| Integrated COVID-19 laboratory dataset (SARS-CoV2 tests from private/public labs) <sup>S1</sup>                                                                                                                                    | Jan,2020-onward          |
| Integrated COVID-19 case surveillance data (positive laboratory tests and historical regional health authority case data integrated with vaccination, genomic screening/sequencing, hospitalization, and death data) <sup>S2</sup> | Jan,2020-onward          |
| Provincial COVID-19 Monitoring Solution (critical and non-critical care hospital census data) <sup>S3</sup>                                                                                                                        | Jan,2020-onward          |
| Provincial Immunizations Registry (COVID-19 vaccination data) <sup>S4</sup>                                                                                                                                                        | Dec,2020-onward          |
| Provincial Laboratory Information Solution (laboratory tests from private/public labs) <sup>S5</sup>                                                                                                                               | Jan,2020-onward          |
| Public Health Reporting Data warehouse (Influenza laboratory tests) <sup>S6</sup>                                                                                                                                                  | Jan,2008-onward          |
| Emergency department visits (hospital-based and community-based ambulatory care)                                                                                                                                                   | Mar,2020-onward          |
| <b>Ministry of Health (MoH) Administrative Data Sources:</b>                                                                                                                                                                       | <b>Data Date Ranges:</b> |
| Client Roster (CR) (registry of enrollment in the universal public health insurance plan including residential history) <sup>S7</sup>                                                                                              | 2008/9-onward            |
| Discharge Abstracts Database (DAD) (hospital discharge records) <sup>S8</sup>                                                                                                                                                      | 2008/9-onward            |
| Medical Services Plan (MSP) (physician diagnostic and billing data for services provided through universal public health insurance plan) <sup>S9</sup>                                                                             | 2008/9-onward            |
| PharmaNet (Pharma) (prescription drugs dispensed from community pharmacies, includes medications covered by public and private insurance plans) <sup>S10</sup>                                                                     | 2008/9-onward            |
| BC Vital Statistics (VS) (deaths registry) <sup>S11</sup>                                                                                                                                                                          | 2008/9-onward            |
| National Ambulatory Care Reporting System (NACRS) (hospital-based and community-based ambulatory care) <sup>S12</sup>                                                                                                              | 2011/12-onward           |
| Chronic Disease Registry <sup>S13</sup>                                                                                                                                                                                            | 2008/9-2018/19           |
| 811 Calls (respiratory calls only) <sup>S14</sup>                                                                                                                                                                                  | 2014-onward              |
| Health System Matrix <sup>S15</sup>                                                                                                                                                                                                | 2018/19-onward           |
| Population Grouper Methodology <sup>S16</sup>                                                                                                                                                                                      | 2008/9-onward            |

**Table S2. Prescription drugs used to define hepatitis C treatment initiation**

| Drug category               | Generic name                                                                                                                                                                     |
|-----------------------------|----------------------------------------------------------------------------------------------------------------------------------------------------------------------------------|
| a) Direct-acting antivirals | elbasvir/grazoprevir<br>glecaprevir/pibrentasvir<br>ledipasvir/sofosbuvir<br>sofosbuvir<br>sofosbuvir/velpatasvir<br>sofosbuvir/velpatasvir/voxilaprevir                         |
| b) Other hepatitis C drugs  | asunaprevir<br>boceprevir<br>daclatasvir<br>ombitasvir/paritaprevir/ritonavir and dasabuvir<br>peginterferon<br>ribavirin<br>ribavirin/peginterferon<br>simeprevir<br>telaprevir |

**Table S3. Median monthly number of individuals initiating hepatitis C treatment during pre-policy period (April 2018 - March 2020) in British Columbia, by population**

| Population                     | Number of individuals initiating hepatitis C treatment per month |                     |
|--------------------------------|------------------------------------------------------------------|---------------------|
|                                | Median                                                           | Interquartile range |
| a) Overall                     | 256                                                              | 89.5                |
| b) Sex                         |                                                                  |                     |
| Female                         | 90.5                                                             | 34.25               |
| Male                           | 156                                                              | 55                  |
| c) Birth cohort                |                                                                  |                     |
| Before 1945                    | 7.5                                                              | 4.5                 |
| 1945–1964                      | 140.5                                                            | 71                  |
| 1965–1974                      | 55                                                               | 10.75               |
| 1975 or later                  | 52                                                               | 10.75               |
| d) Injection drug use status   |                                                                  |                     |
| People who inject drugs        | 143.5                                                            | 72.2                |
| People who do not inject drugs | 109.5                                                            | 24.75               |

**Table S4. Number of individuals initiating HCV treatment in British Columbia by month and year, 2018 to 2022**

| Month                   | Number of individuals initiating HCV treatment by year |       |       |       |       |
|-------------------------|--------------------------------------------------------|-------|-------|-------|-------|
|                         | 2018                                                   | 2019  | 2020  | 2021  | 2022  |
| January                 | 248                                                    | 296   | 218   | 155   | 105   |
| February                | 223                                                    | 276   | 211   | 127   | 119   |
| March                   | 282                                                    | 277   | 192   | 150   | 91    |
| April                   | 316                                                    | 266   | 138   | 157   | 113   |
| May                     | 403                                                    | 244   | 137   | 142   | 115   |
| June                    | 393                                                    | 246   | 157   | 146   | 135   |
| July                    | 348                                                    | 219   | 137   | 118   | 109   |
| August                  | 322                                                    | 196   | 105   | 100   | 126   |
| September               | 271                                                    | 195   | 150   | 117   | 112   |
| October                 | 338                                                    | 215   | 157   | 104   | 93    |
| November                | 298                                                    | 213   | 126   | 117   | 129   |
| December                | 213                                                    | 169   | 125   | 72    | 95    |
| Total, n                | 3,655                                                  | 2,812 | 1,853 | 1,505 | 1,342 |
| Difference from 2019, % | 30.0                                                   | -     | -34.1 | -46.5 | -52.3 |

**(a) Overall**

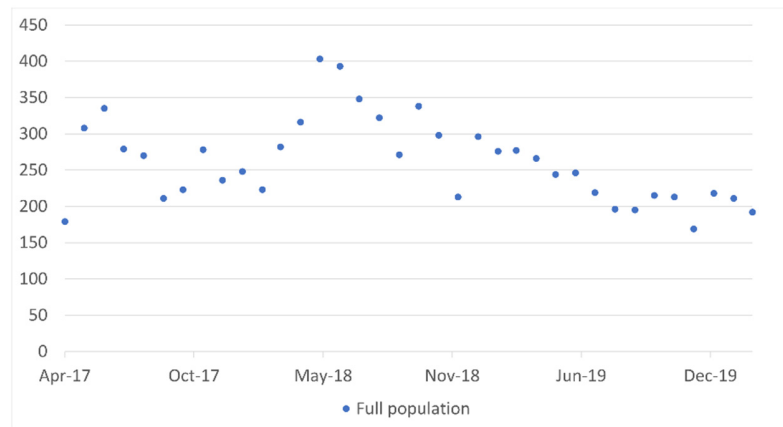

**(b) Stratified by sex**

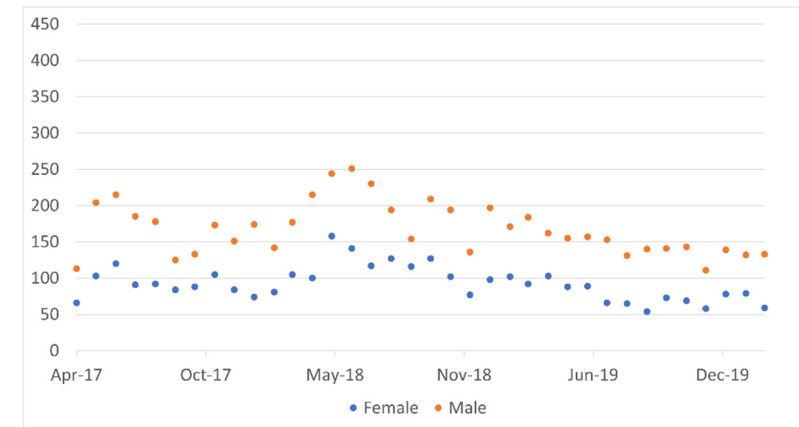

**(c) Stratified by birth cohort**

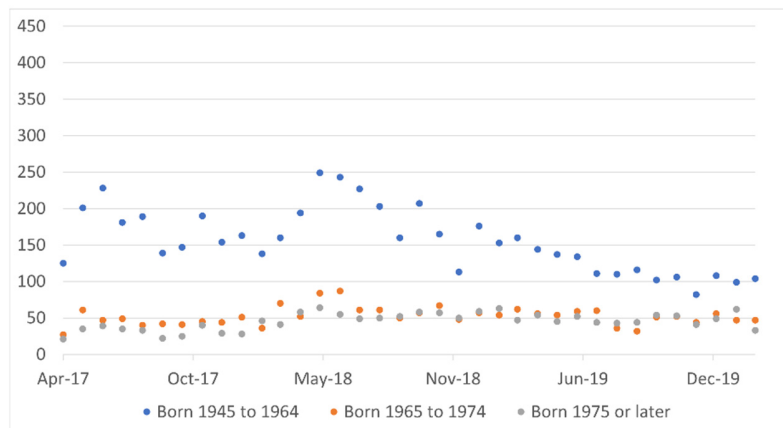

**(d) Stratified by injection drug use status**

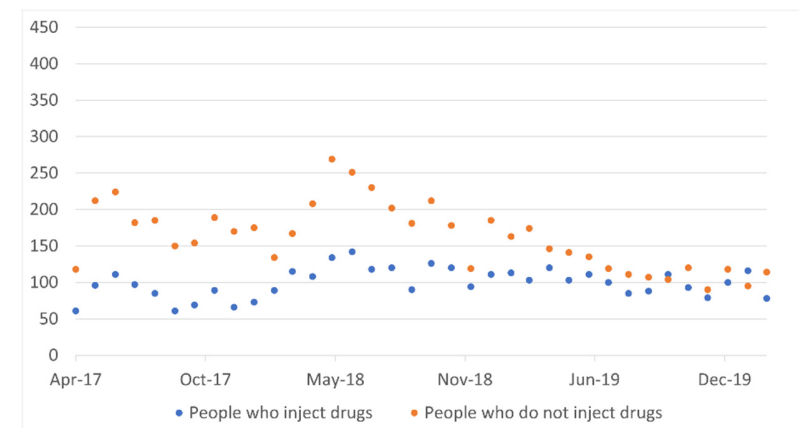

**Figure S1. Monthly number of individuals initiating hepatitis C treatment in British Columbia prior to COVID-19-related policies (April 2017 to March 2020)**

**Figure S2. Estimated number of individuals initiating HCV treatment following COVID-19-related policies with 95% confidence band, compared to counterfactual, stratified by sex**

**(a) Female**

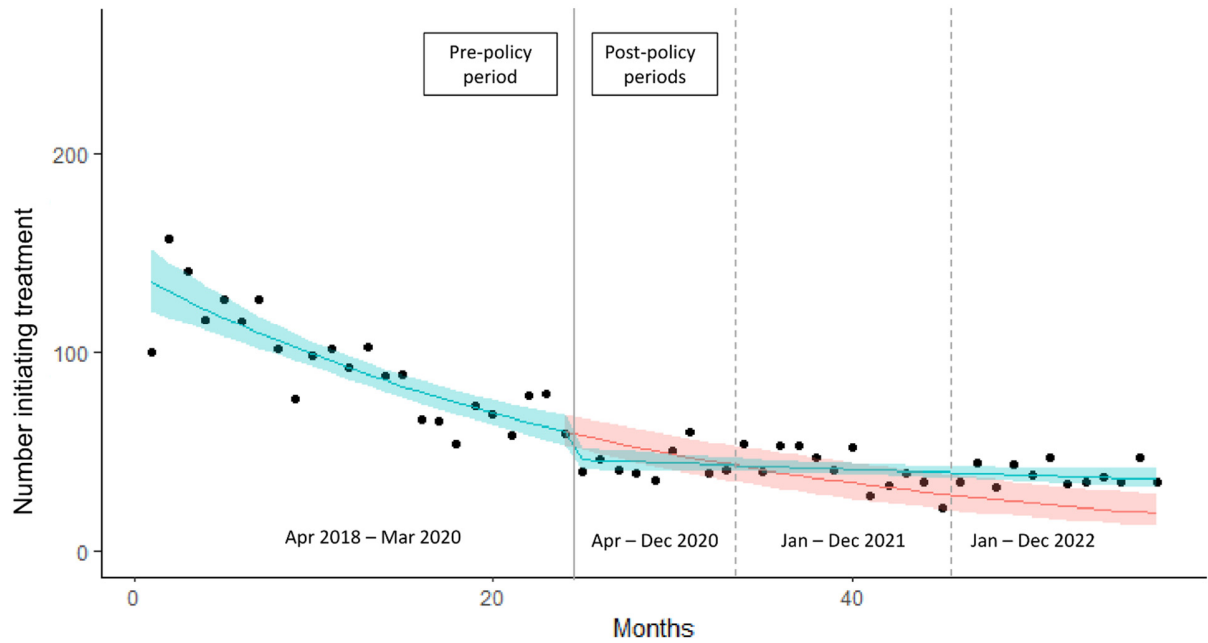

**(b) Male**

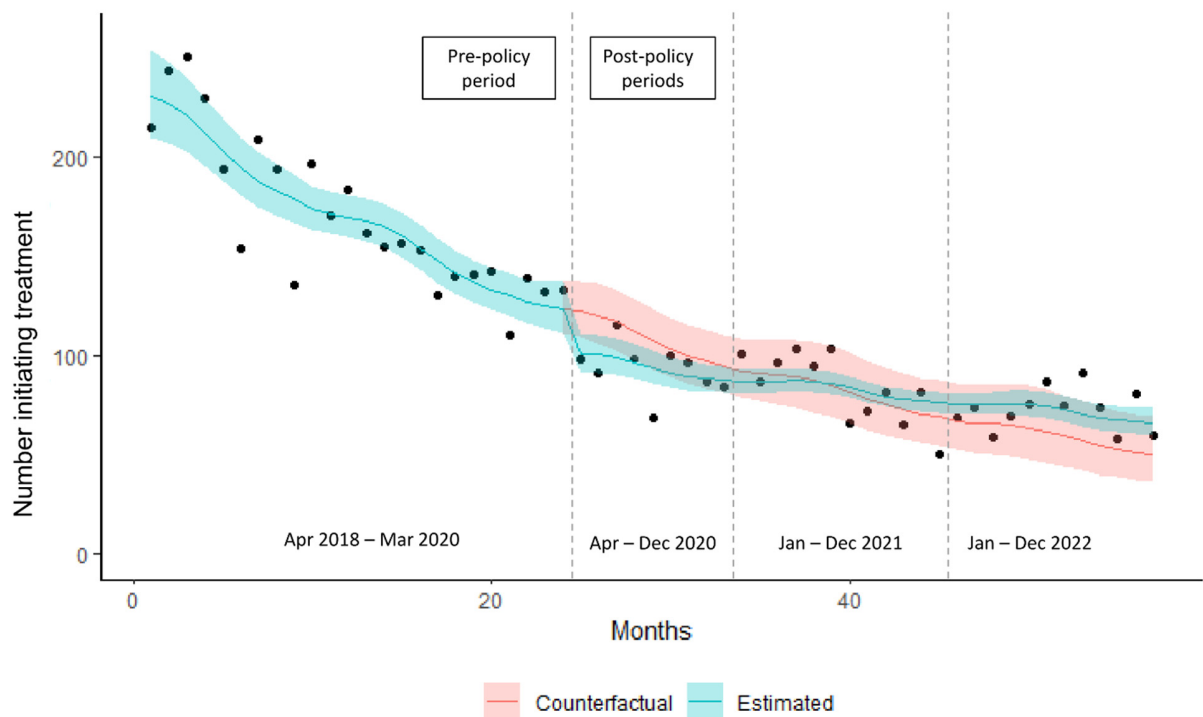

## Supplementary references

- S1. British Columbia Centre for Disease Control [creator]. Integrated COVID-19 laboratory dataset (SARS-CoV2 tests from private/public labs). Public Health Reporting Data Warehouse, British Columbia Centre for Disease Control [publisher] (2020). 2021.
- S2. British Columbia Centre for Disease Control [creator]. Integrated COVID-19 case surveillance data. British Columbia Centre for Disease Control [publisher]. (2020). 2021.
- S3. Provincial Health Services Authority [creator]. Provincial COVID-19 Monitoring Solution. Provincial Health Services Authority [publisher]. (2020). 2021.
- S4. Provincial Health Services Authority [creator]. COVID-19 vaccination data. Provincial Immunizations Registry, Provincial Public Health Information Systems [publisher]. (2020). 2021.
- S5. Provincial Health Services Authority [creator]. Provincial Laboratory Information Solution. Provincial Public Health Information Systems [publisher]. (2020). 2021.
- S6. British Columbia Centre for Disease Control [creator]. Respiratory datamart, Public Health Reporting Data Warehouse, British Columbia Centre for Disease Control [publisher] (2020). 2021.
- S7. British Columbia Ministry of Health [creator]. Client Roster (Client Registry System/Enterprise Master Patient Index). British Columbia Ministry of Health [publisher]. Data Extract. MOH (2020). 2021. <https://www2.gov.bc.ca/gov/content/health/health-forms/online-services>
- S8. British Columbia Ministry of Health [creator]. Discharge Abstract Database (Hospital Separations). British Columbia Ministry of Health [publisher]. Data Extract. MOH (2020). 2021. <https://www2.gov.bc.ca/gov/content/health/health-forms/online-services>
- S9. British Columbia Ministry of Health [creator]. Medical Services Plan (MSP) Payment Information File. British Columbia Ministry of Health [publisher]. Data Extract. MOH (2020). 2021. <https://www2.gov.bc.ca/gov/content/health/health-forms/online-services>
- S10. British Columbia Ministry of Health [creator]. PharmaNet. British Columbia Ministry of Health [publisher]. Data Extract. MOH (2020). 2021. <https://www2.gov.bc.ca/gov/content/health/health-forms/online-services>
- S11. BC Vital Statistics Agency [creator]. Vital Statistics Deaths. BC Vital Statistics Agency [publisher]. Data Extract. BC Vital Statistics Agency (2020). 2021. <https://www2.gov.bc.ca/gov/content/health/health-forms/online-services>
- S12. British Columbia Ministry of Health [creator]. National Ambulatory Care Reporting System. British Columbia Ministry of Health [publisher]. Data Extract. MOH (2020). 2021. <https://www2.gov.bc.ca/gov/content/health/health-forms/online-services>
- S13. British Columbia Ministry of Health [creator]. Chronic Disease Registry. British Columbia Ministry of Health [publisher]. Data Extract. MOH (2020). 2021. <https://www2.gov.bc.ca/gov/content/health/health-forms/online-services>
- S14. British Columbia Ministry of Health [creator]. 811 calls. British Columbia Ministry of Health [publisher]. Data Extract. MOH (2020). 2021. <https://www2.gov.bc.ca/gov/content/health/health-forms/online-services>

- S15. British Columbia Ministry of Health [creator]. Health System Matrix. British Columbia Ministry of Health [publisher]. Data Extract. MOH (2020). 2021.  
<https://www2.gov.bc.ca/gov/content/health/health-forms/online-services>
- S16. British Columbia Ministry of Health [creator]. Population Grouper Methodology. British Columbia Ministry of Health [publisher]. Data Extract. MOH (2020). 2021.  
<https://www2.gov.bc.ca/gov/content/health/health-forms/online-services>
